# Supplementary material for: Morphological novelty emerges from pre-existing phenotypic plasticity
Source: Springer Nature journal article supplement (doi:10.1038/s41559-018-0601-8), 2018-07-06
Supplement: 41559_2018_601_MOESM1_ESM.pdf [file 41559_2018_601_MOESM1_ESM.pdf]

In the format provided by the authors and unedited.

# Morphological novelty emerges from pre-existing phenotypic plasticity

Nicholas A. Levis \*, Andrew J. Isdaner and David W. Pfennig

---

Department of Biology, University of North Carolina, Chapel Hill, NC, USA. \*e-mail: [nicholasalevis@gmail.com](mailto:nicholasalevis@gmail.com)

1  
2  
3  
4  
5  
6  
7  
8

Supplementary Information for  
Morphological novelty emerges from pre-existing phenotypic plasticity

Nicholas A. Levis<sup>1\*</sup>, Andrew J. Isdaner<sup>1</sup>, and David W. Pfennig<sup>1</sup>

<sup>1</sup>Department of Biology, CB#3280, University of North Carolina, Chapel Hill, NC 27599, USA

\*Corresponding author; E-mail: [nicholasalevis@gmail.com](mailto:nicholasalevis@gmail.com)

9 Table S1. Trophic traits associated with carnivore-omnivore polyphenism and their functions.

| Trait (abbreviation)        | Function                                                                 | Reference |
|-----------------------------|--------------------------------------------------------------------------|-----------|
| Denticle rows (DR)          | rasps food off surfaces; more DR favored for smaller prey                | 55,56     |
| Keratinized mouthparts (MP) | grasps prey; larger, more serrated MP favored for larger prey            | 55,56     |
| Orbitohyoideus muscle (OH)  | opens mouth; larger OH favored for larger prey                           | 56-58     |
| Gut coils (GC)              | used to digest food; more GC favored for more plants or bacteria in diet | 12,29     |

11 Table S2. Results from morphological experiment using *Sc. holbrookii* reared on alternative  
 12 diets. Values under ‘Shrimp’ and ‘Detritus’ indicate the mean ( $\pm$  s.e.m.) of each trait on the  
 13 respective diet. Bolded rows indicate that there was a significant difference between diets  
 14 according to a likelihood ratio test.

| Variable          | Shrimp              | Detritus            | $\chi^2$     | <i>P</i> value                          |
|-------------------|---------------------|---------------------|--------------|-----------------------------------------|
| <b>SVL (mm)</b>   | <b>8.11 (0.16)</b>  | <b>8.96 (0.11)</b>  | <b>32.79</b> | <b><math>1.60 \times 10^{-8}</math></b> |
| Gosner Stage      | 31.97 (0.35)        | 33.03 (0.21)        | 1.05         | 0.0810                                  |
| <b>GC</b>         | <b>5.50 (0.07)</b>  | <b>6.53 (0.13)</b>  | <b>5.33</b>  | <b>0.0082</b>                           |
| <b>DR</b>         | <b>13.30 (0.31)</b> | <b>16.68 (0.35)</b> | <b>22.96</b> | <b><math>1.30 \times 10^{-6}</math></b> |
| <b>MP</b>         | <b>1.23 (0.06)</b>  | <b>1.78 (0.08)</b>  | <b>6.05</b>  | <b>0.0065</b>                           |
| <b>LMP</b>        | <b>2.05 (0.13)</b>  | <b>2.62 (0.13)</b>  | <b>4.14</b>  | <b>0.0131</b>                           |
| Size-corrected OH | -0.002 (0.01)       | 0.002 (0.01)        | 0.05         | 0.1911                                  |

15

16 Table S3. Summary statistics from an ANOVA (with type III sum of squares) on various trophic  
 17 traits in *Sc. holbrookii* reared on alternative diets. Every trait had a significant difference between  
 18 families and/or a significant family\*diet interaction (bolded values). Diet dependence of trait  
 19 expression (i.e., plasticity) corroborates our findings in Table S2.

| Snout-vent length          |                |          |              |                | Denticle rows      |                |          |              |                |
|----------------------------|----------------|----------|--------------|----------------|--------------------|----------------|----------|--------------|----------------|
| Variable                   | Sum of Squares | DF       | <i>F</i>     | <i>P</i> value | Variable           | Sum of Squares | DF       | <i>F</i>     | <i>P</i> value |
| <b>Family</b>              | <b>22.95</b>   | <b>1</b> | <b>41.2</b>  | <b>0.000</b>   | <b>Family</b>      | <b>30.80</b>   | <b>1</b> | <b>4.98</b>  | <b>0.028</b>   |
| Diet                       | 5.27           | 1        | 9.47         | 0.003          | Diet               | 156.80         | 1        | 25.35        | 0.000          |
| Family*Diet                | 1.87           | 1        | 3.36         | 0.069          | Family*Diet        | 0.70           | 1        | 0.11         | 0.742          |
| Gosner developmental stage |                |          |              |                | Mouthpart score    |                |          |              |                |
| Variable                   | Sum of Squares | DF       | <i>F</i>     | <i>P</i> value | Variable           | Sum of Squares | DF       | <i>F</i>     | <i>P</i> value |
| <b>Family</b>              | <b>96</b>      | <b>1</b> | <b>68.54</b> | <b>0.000</b>   | <b>Family</b>      | <b>3.75</b>    | <b>1</b> | <b>14.08</b> | <b>0.000</b>   |
| Diet                       | 0              | 1        | 0            | 1.000          | Diet               | 11.27          | 1        | 42.30        | 0.000          |
| <b>Family*Diet</b>         | <b>34</b>      | <b>1</b> | <b>24.3</b>  | <b>0.000</b>   | <b>Family*Diet</b> | <b>3.01</b>    | <b>1</b> | <b>11.29</b> | <b>0.001</b>   |
| Size-corrected OH          |                |          |              |                | Gut length         |                |          |              |                |
| Variable                   | Sum of Squares | DF       | <i>F</i>     | <i>P</i> value | Variable           | Sum of Squares | DF       | <i>F</i>     | <i>P</i> value |
| Family                     | 0.02           | 11       | 3.69         | 0.057          | <b>Family</b>      | <b>29.40</b>   | <b>1</b> | <b>76.78</b> | <b>0.000</b>   |
| Diet                       | 0.01           | 1        | 1.95         | 0.165          | Diet               | 1.67           | 1        | 4.34         | 0.039          |
| <b>Family*Diet</b>         | <b>0.03</b>    | <b>1</b> | <b>4.87</b>  | <b>0.029</b>   | <b>Family*Diet</b> | <b>14.70</b>   | <b>1</b> | <b>38.29</b> | <b>0.000</b>   |

20  
 21

22 Table S4. The genes whose expression was examined in this study. ‘Bias’ indicates the biased  
 23 expression pattern described by <sup>30</sup>.

| Gene                                                    | Symbol         | Bias      | Functional Group |
|---------------------------------------------------------|----------------|-----------|------------------|
| basic transcription factor 3 <sup>ap</sup>              | <i>btf3</i>    | Carnivore | Gene regulation  |
| T-box transcription factor TBX15-like <sup>ap</sup>     | <i>tbx15</i>   | Carnivore | Gene regulation  |
| peptidase M20 domain containing <sup>ap,wc</sup>        | <i>pm20d2</i>  | Carnivore | Metabolism       |
| collagen, type II, alpha 1 <sup>ap</sup>                | <i>col2a1</i>  | Carnivore | Structural       |
| pancreatic triacylglycerol lipase-like <sup>ap,wc</sup> | <i>pnlip</i>   | Omnivore  | Metabolism       |
| amylase, alpha 2A (pancreatic) <sup>ap,wc</sup>         | <i>amy2a</i>   | Omnivore  | Metabolism       |
| peptidoglycan recognition protein 1 <sup>ap</sup>       | <i>pglyrp1</i> | Omnivore  | Immunity         |
| transferrin <sup>ap</sup>                               | <i>tf</i>      | Omnivore  | Immunity         |
| beta (β)-actin <sup>ap</sup>                            | <i>actb</i>    | Control   | Structural       |
| glyceraldehyde-3-phosphate dehydrogenase <sup>wc</sup>  | <i>gapdh</i>   | Control   | Metabolism       |

24 ap = genes used in the ancestral plasticity experiment; wc = genes used the wild-caught *Spea* experiment

25 Table S5. Summary statistics from analysis of diet-dependent gene expression plasticity in *Sc. holbrookii*. Five genes had diet-  
 26 dependent expression plasticity ‘Bias’ refers to morph-biased expression in *Spea*. Values below ‘RQ<sub>Shrimp</sub>’ and ‘RQ<sub>Detritus</sub>’ are the  
 27 mean expression levels ( $\pm$  s.e.m.) of tadpoles reared on each diet. logRatio refers to our measure of plasticity (see Methods). We called  
 28 the expression of a gene as plastic (Y) if its RQ between diets was significantly different ( $P$  value  $< 0.05$ ) and if its logRatio ( $\pm$  99%  
 29 CI) did not overlap with 0, otherwise it was called non-plastic (N).

| Gene           | Bias      | RQ <sub>Shrimp</sub> ( $\pm$ s.e.m.) | RQ <sub>Detritus</sub> ( $\pm$ s.e.m.) | $\chi^2$ | $P$ value | logRatio | Lower 99% CI | Upper 99% CI | Plasticity |
|----------------|-----------|--------------------------------------|----------------------------------------|----------|-----------|----------|--------------|--------------|------------|
| <i>btf3</i>    | Carnivore | 0.019 (0.005)                        | 0.354 (0.124)                          | 13.6013  | 0.0004    | -2.949   | -3.991       | -1.951       | Y          |
| <i>col2a1</i>  | Carnivore | 0.051 (0.015)                        | 0.537 (0.171)                          | 10.2575  | 0.0025    | -2.346   | -3.402       | -1.309       | Y          |
| <i>tbx15</i>   | Carnivore | 0.043 (0.012)                        | 0.746 (0.337)                          | 6.0612   | 0.0244    | -2.848   | -4.227       | -1.607       | Y          |
| <i>pm20d2</i>  | Carnivore | 0.008 (0.002)                        | 0.389 (0.140)                          | 17.3107  | 0.0003    | -3.843   | -5.011       | -2.736       | Y          |
| <i>tf</i>      | Omnivore  | 0.037 (0.011)                        | 0.372 (0.105)                          | 15.9796  | 0.0003    | -2.316   | -3.108       | -1.505       | Y          |
| <i>pnlip</i>   | Omnivore  | 0.314 (0.222)                        | 0.244 (0.103)                          | 0.4017   | 0.4884    | 0.251    | -1.959       | 3.014        | N          |
| <i>pglyrp1</i> | Omnivore  | 0.349 (0.202)                        | 0.320 (0.120)                          | 0.1785   | 0.5497    | 0.088    | -1.960       | 2.478        | N          |
| <i>amy2a</i>   | Omnivore  | 0.281 (0.157)                        | 0.254 (0.114)                          | 0.048    | 0.6000    | 0.099    | -2.330       | 2.682        | N          |
| <i>actb</i>    |           | ---                                  | ---                                    | ---      | ---       | -2.619   | -5.230       | 0.154        | N          |

30

31 Table S6. Results from morphological experiment using *Sp. multiplicata* reared on alternative  
 32 diets. Values under ‘Shrimp’ and ‘Detritus’ indicate the mean ( $\pm$  s.e.m.) of each trait on the  
 33 respective diet. Bolded rows indicate that there was a significant difference between diets  
 34 according to a likelihood ratio test.

| Variable                 | Shrimp              | Detritus             | $\chi^2$     | <i>P</i> value                                 |
|--------------------------|---------------------|----------------------|--------------|------------------------------------------------|
| SVL (mm)                 | 14.04 (0.11)        | 14.08 (0.07)         | 0.046        | 0.398                                          |
| Gosner Stage             | 38.62 (0.16)        | 38.65 (0.10)         | 0.001        | 0.427                                          |
| Mass                     | 322.91 (7.45)       | 324.68 (5.03)        | 0.006        | 0.437                                          |
| <b>Size-corrected OH</b> | <b>0.01 (0.009)</b> | <b>-0.01 (0.006)</b> | <b>5.63</b>  | <b>0.016</b>                                   |
| <b>MP</b>                | <b>1.40 (0.05)</b>  | <b>1.08 (0.02)</b>   | <b>4.98</b>  | <b>0.020</b>                                   |
| <b>DR</b>                | <b>12.15 (0.27)</b> | <b>15.41 (0.26)</b>  | <b>56.87</b> | <b>7.21<math>\times</math>10<sup>-14</sup></b> |
| <b>GC</b>                | <b>7.61 (0.19)</b>  | <b>10.76 (0.16)</b>  | <b>81.44</b> | <b>6.82<math>\times</math>10<sup>-16</sup></b> |

35

36



37 Table S7. Results from Fisher's exact test on the number of individuals with ('Yes') and without  
38 ('No') detectable levels of gene product for each gene.

|                | <i>pm20d2</i> |    | <i>pnlip</i> |    | <i>amy2a</i> |    |
|----------------|---------------|----|--------------|----|--------------|----|
|                | Yes           | No | Yes          | No | Yes          | No |
| Carnivores     | 11            | 1  | 0            | 12 | 1            | 11 |
| Omnivores      | 2             | 8  | 8            | 2  | 9            | 1  |
| <i>P</i> value | 0.0015        |    | 0.0001       |    | 0.0003       |    |

39

40

41 Table S8. Results from our likelihood ratio test to evaluate if morph influences the expression of  
 42 each gene in wild-caught *Sp. multiplicata*.

43

| <i>amy2a</i>  | Model | AIC value | $\chi^2$ | Df   | <i>P</i> value |
|---------------|-------|-----------|----------|------|----------------|
|               | Morph | 101.66    | 37.263   | 1.00 | <0.001         |
|               | Null  | 136.92    | ---      | ---  | ---            |
| <i>pm20d2</i> | Model | AIC value | $\chi^2$ | Df   | <i>P</i> value |
|               | Morph | 100.45    | 4.909    | 1.00 | 0.0267         |
|               | Null  | 103.36    | ---      | ---  | ---            |
| <i>pnlip</i>  | Model | AIC value | $\chi^2$ | Df   | <i>P</i> value |
|               | Morph | 96.898    | 40.313   | 1.00 | <0.001         |
|               | Null  | 135.212   | ---      | ---  | ---            |

44

45 Table S9. Summary statistics from our comparison of the palate spike among wild-caught *Spea*  
 46 and *Scaphiopus*. Overall, there was a significant effect of lineage on extent of spike formation  
 47 (top), but not all groups significantly differed from each other (bottom). On the bottom, effect  
 48 sizes (*Z* scores) are above the diagonal and *P* values are below the diagonal.

| Model | AIC value | $\chi^2$ | Df   | <i>P</i> value |
|-------|-----------|----------|------|----------------|
| Null  | 710.73    | ---      | ---  | ---            |
| Full  | 657.51    | 41.219   | 3    | < 0.0001       |
|       | Sb-S      | Sc       | Sm-C | Sm-O           |
| Sb-S  | ---       | 14.77    | 11.3 | 15.69          |
| Sc    | 0.0001    | ---      | 3.49 | -0.67          |
| Sm-C  | 0.0001    | 0.0034   | ---  | 3.29           |
| Sm-O  | 0.0001    | 0.6969   | 0.01 | ---            |

Sb-S = Sympatric *Sp. bombifrons*; Sc = *Sc. couchii*; Sm-C = *Sp. multiplicata* carnivores;  
 Sm-O = *Sp. multiplicata* omnivores

49

50 Table S10. Estimated family variance ( $V_{AF}$ ) and total estimated variance ( $V_{total}$ ) for fitness and  
 51 morphological parameters. The 95% confidence intervals ( $CI$ ) for broad-sense heritabilities ( $H^2$ )  
 52 were calculated using 500 bootstrap replicates of the original data. If  $H^2$  confidence intervals of  
 53 alternative diets were not overlapping for a particular trait, the  $H^2$  of that trait was considered to  
 54 be significantly diet-dependent. Greater  $H^2$  on a shrimp diet is indicate of the release of cryptic  
 55 genetic variation when fed that diet.

| Species                 | Trait           | Diet     | $V_{AF}$ | $V_{total}$ | $H^2$ | $CI$          | $H^2$ diet dependent? |
|-------------------------|-----------------|----------|----------|-------------|-------|---------------|-----------------------|
| <i>Sc. couchii</i>      | log(SVL)        | Detritus | 0.001    | 0.025       | 0.05  | (-0.12, 0.09) | Y                     |
|                         |                 | Shrimp   | 0.005    | 0.022       | 0.50  | (0.34, 0.65)  |                       |
|                         | Gosner Stage    | Detritus | 0.000    | 1.888       | 0.00  | (-0.13, 0.00) | Y                     |
|                         |                 | Shrimp   | 0.486    | 2.857       | 0.33  | (0.20, 0.49)  |                       |
|                         | Gut length      | Detritus | 0.003    | 0.046       | 0.12  | (-0.04, 0.25) | Y                     |
|                         |                 | Shrimp   | 0.006    | 0.043       | 0.28  | (0.13, 0.40)  |                       |
|                         | log(OH)         | Detritus | 0.001    | 0.009       | 0.19  | (0.02, 0.33)  | N                     |
|                         |                 | Shrimp   | 0.002    | 0.018       | 0.19  | (0.03, 0.33)  |                       |
| <i>Sp. multiplicata</i> | log(SVL)        | Detritus | 0.001    | 0.004       | 0.46  | (-0.05, 0.57) | N                     |
|                         |                 | Shrimp   | 0.002    | 0.012       | 0.26  | (-0.28, 0.48) |                       |
|                         | Gosner stage    | Detritus | 0.113    | 1.468       | 0.14  | (-0.62, 0.36) | N                     |
|                         |                 | Shrimp   | 0.931    | 2.976       | 0.48  | (-0.05, 0.71) |                       |
|                         | Gut length      | Detritus | 0.005    | 4.124       | 0.00  | (-0.50, 0.03) | N                     |
|                         |                 | Shrimp   | 1.208    | 4.031       | 0.46  | (0.03, 0.56)  |                       |
|                         | log(OH)         | Detritus | 0.001    | 0.008       | 0.27  | (-0.21, 0.36) | N                     |
|                         |                 | Shrimp   | 0.003    | 0.028       | 0.19  | (-0.38, 0.36) |                       |
|                         | Denticle rows   | Detritus | 0.563    | 9.772       | 0.11  | (-0.34, 0.17) | N                     |
|                         |                 | Shrimp   | 2.559    | 8.268       | 0.47  | (0.01, 0.59)  |                       |
|                         | Mouthpart score | Detritus | 0.000    | 0.078       | 0.00  | (-0.54, 0.11) | N                     |
|                         |                 | Shrimp   | 0.000    | 0.343       | 0.00  | (-0.46, 0.11) |                       |

56 *Sc. couchii* data are from <sup>26</sup>

57 Table S11. Concentration and purity values from RNA extractions of *Sc. holbrookii* (left) and  
 58 wild-caught *Sp. multiplicata* (right). For *Sc. holbrookii*, the sample ID denotes family-individual-  
 59 diet. For *Sp. multiplicata*, the sample ID denotes population-morph-individual.

60

| Sample | Mean concentration (ng/ $\mu$ L) | 260/280 | 260/230 | Sample | Mean concentration (ng/ $\mu$ L) | 260/280 | 260/230 |
|--------|----------------------------------|---------|---------|--------|----------------------------------|---------|---------|
| 1.1s   | 881.5                            | 2.11    | 2.21    | SC1    | 724.8                            | 1.96    | 2.00    |
| 1.2s   | 1171.4                           | 2.06    | 1.82    | SC2    | 652.9                            | 1.99    | 2.00    |
| 1.3s   | 1303.9                           | 2.07    | 1.96    | SC3    | 766.9                            | 1.98    | 2.00    |
| 1.4s   | 1339.5                           | 2.07    | 2.06    | SC4    | 1168.8                           | 2.00    | 1.94    |
| 1.5s   | 966.5                            | 2.07    | 2.04    | SC5    | 871                              | 2.05    | 1.99    |
| 1.6s   | 1147.8                           | 2.09    | 2.08    | SO1    | 532.1                            | 1.58    | 1.41    |
| 1.7s   | 1073.9                           | 2.06    | 1.96    | SO2    | 399.9                            | 1.68    | 1.55    |
| 1.1d   | 501                              | 2.05    | 1.24    | SO3    | 627.6                            | 1.65    | 1.54    |
| 1.2d   | 434.4                            | 2.06    | 1.83    | SO4    | 468.4                            | 1.71    | 1.51    |
| 1.3d   | 315.2                            | 2.07    | 1.44    | SO5    | 486.1                            | 1.66    | 1.48    |
| 1.4d   | 414.9                            | 2.10    | 2.01    | PC1    | 742.9                            | 1.91    | 1.75    |
| 1.5d   | 377.03                           | 2.06    | 1.67    | PC2    | 943.5                            | 1.98    | 1.85    |
| 1.6d   | 808                              | 2.07    | 2.05    | PC3    | 1149.2                           | 2.01    | 2.00    |
| 1.7d   | 499.9                            | 2.06    | 1.64    | PC4    | 1148.9                           | 1.99    | 1.87    |
| 2.1s   | 1177.8                           | 2.08    | 2.01    | PC5    | 729.3                            | 2.10    | 2.12    |
| 2.2s   | 918.6                            | 2.06    | 2.07    | PO1    | 555.6                            | 1.84    | 1.54    |
| 2.3s   | 1091.6                           | 2.08    | 2.11    | PO2    | 827.8                            | 1.89    | 1.50    |
| 2.4s   | 1217.9                           | 2.06    | 2.04    | PO3    | 671.4                            | 1.80    | 1.73    |
| 2.5s   | 968.1                            | 2.08    | 2.07    | PO4    | 683.5                            | 1.84    | 1.68    |
| 2.6s   | 989                              | 2.06    | 2.04    | PO5    | 946.4                            | 2.02    | 2.05    |
| 2.7s   | 1227                             | 2.06    | 2.00    | BC1    | 894.8                            | 2.00    | 2.03    |
| 2.1d   | 746.1                            | 2.07    | 2.12    | BC2    | 715.6                            | 1.98    | 2.01    |
| 2.2d   | 791.8                            | 2.06    | 1.88    | BO1    | 907.6                            | 1.81    | 1.57    |
| 2.3d   | 899.2                            | 2.08    | 1.62    | BO2    | 504.1                            | 1.70    | 1.52    |
| 2.4d   | 949.2                            | 2.08    | 2.06    |        |                                  |         |         |
| 2.5d   | 370.9                            | 2.04    | 1.49    |        |                                  |         |         |
| 2.6d   | 849.7                            | 2.08    | 1.94    |        |                                  |         |         |
| 2.7d   | 619.2                            | 2.07    | 2.10    |        |                                  |         |         |

61 s = shrimp diet; d = detritus diet; S =Silver Creek; P = Peach Orchard Rd.; B = Observatory; C = carnivore; O =  
 62 omnivore

63

64 Table S12. Reaction components for qPCR.  
 65

| Component                                                             | Volume<br>( $\mu$ L) | Final<br>Concentration |
|-----------------------------------------------------------------------|----------------------|------------------------|
| iTaq <sup>TM</sup> universal SYBR <sup>®</sup> Green supermix<br>(2x) | 10                   | 1X                     |
| Forward and reverse primers                                           | 1 (each)             | 500 nM                 |
| cDNA template                                                         | 2                    | 300 pg                 |
| H <sub>2</sub> O                                                      | 6                    | ---                    |

66  
 67

68 Table S13. Reaction conditions for qPCR.

| Setting  | Polymerase<br>Activation and<br>DNA<br>Denaturation at<br>95°C, sec | Amplification                |                                                       |    | Cycles                        | Melt Curve Analysis |
|----------|---------------------------------------------------------------------|------------------------------|-------------------------------------------------------|----|-------------------------------|---------------------|
|          |                                                                     | Denaturation at 95°C,<br>sec | Annealing/Extension<br>and Plate read at<br>60°C, sec |    |                               |                     |
| Standard | 30                                                                  | 15                           | 60                                                    | 40 | Instrument default<br>setting |                     |

69

70

71 Table S14. Genbank accessions and qPCR primer sequences for each gene.

| Gene                      | Accession   | Left Primer Sequence (5'-3') | Right Primer Sequence (5'-3') |
|---------------------------|-------------|------------------------------|-------------------------------|
| <i>btf3<sup>h</sup></i>   | JN639644    | ACAGCCACTGCTGATGACAA         | CAGCCAAGGAAGCCTGTACT          |
| <i>tbx15<sup>h</sup></i>  | JN639816    | GACTCTGGAAGGAACCGGAC         | CTGCCACCTTGCTGTTTCTG          |
| <i>pm20d2<sup>h</sup></i> | JN639773    | GGTGCAATTCAGGGGATGGA         | TGGATATGCAGCAGCATGAGA         |
| <i>pm20d2<sup>m</sup></i> | JN639770    | AATCTGCAGCTGAGGCAACT         | AACCGCAAAGCTCACATTTC          |
| <i>col2a1<sup>h</sup></i> | JN639671    | TGGTGGACAAGCAAGAGCAA         | TGGGATGCATCAGTGGACAG          |
| <i>pnlip<sup>h</sup></i>  | JN639778    | TGGACTTCTTCCCAATGGC          | GGTGTGGCGTAGTGATGC            |
| <i>pnlip<sup>m</sup></i>  | JN639775    | TCCCAGTTTAGGTTTTGGA          | AGAACAGGGGTAGCTGACGA          |
| <i>amy2a<sup>h</sup></i>  | JN639636    | TGGACGTGGAAACAAAGGGT         | GAGTGCCTTCTTTCTGCCCA          |
| <i>amy2a<sup>m</sup></i>  | JN639633.1  | TGGGTCAACCAAATCTGTCA         | GAGTGGCGTCCATATTCCAT          |
| <i>tf<sup>h</sup></i>     | JN639821    | GACCATGCCAAAGCAGGCAAA        | TTAGCAATCAGGCCGACAGG          |
| <i>actb<sup>h</sup></i>   | NM_213719.1 | TGCTCTGGACTTTGAGCAGG         | GCTGGAAGAGTGCTTCTGGA          |
| <i>gapdh<sup>m</sup></i>  | BC075438.1  | CTGTGAAAGCGTGGACAGTG         | GTTGGTGTGAACCACGAGAA          |

72 h = primers for *Sc. holbrookii*; m = primers for *Sp. multiplicata*

73



74 Table S15. Results for comparison of control gene expression between diets (for *Sc. holbrookii*)  
75 and morphs (for *Sp. multiplicata*). A Wilcoxon test was performed to assess if expression varied  
76 by treatment. Neither *actb* nor *gapdh* significantly differed between treatments.

| Gene         | Species                 | Z       | P value |
|--------------|-------------------------|---------|---------|
| <i>actb</i>  | <i>Sc. holbrookii</i>   | 1.63114 | 0.1029  |
| <i>gapdh</i> | <i>Sp. multiplicata</i> | 1.94517 | 0.0518  |

77  
78

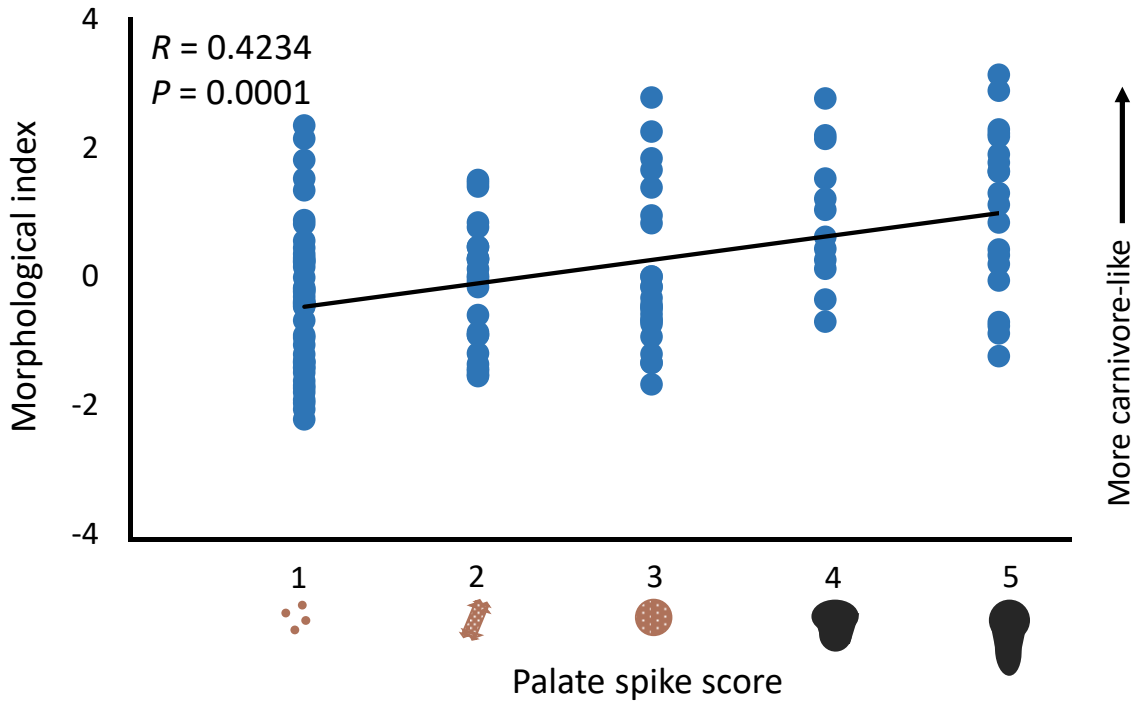

79 Fig. S1. Relationship (Pearson correlation) between palate spike score and morphological index  
 80 in wild-caught *Sp. multiplicata* and *Sp. bombifrons* carnivores (n = 127). A more extensive palate  
 81 spike was significantly positively associated with more carnivore-like tadpoles. Regression line  
 82 is for visualization purposes only.

83

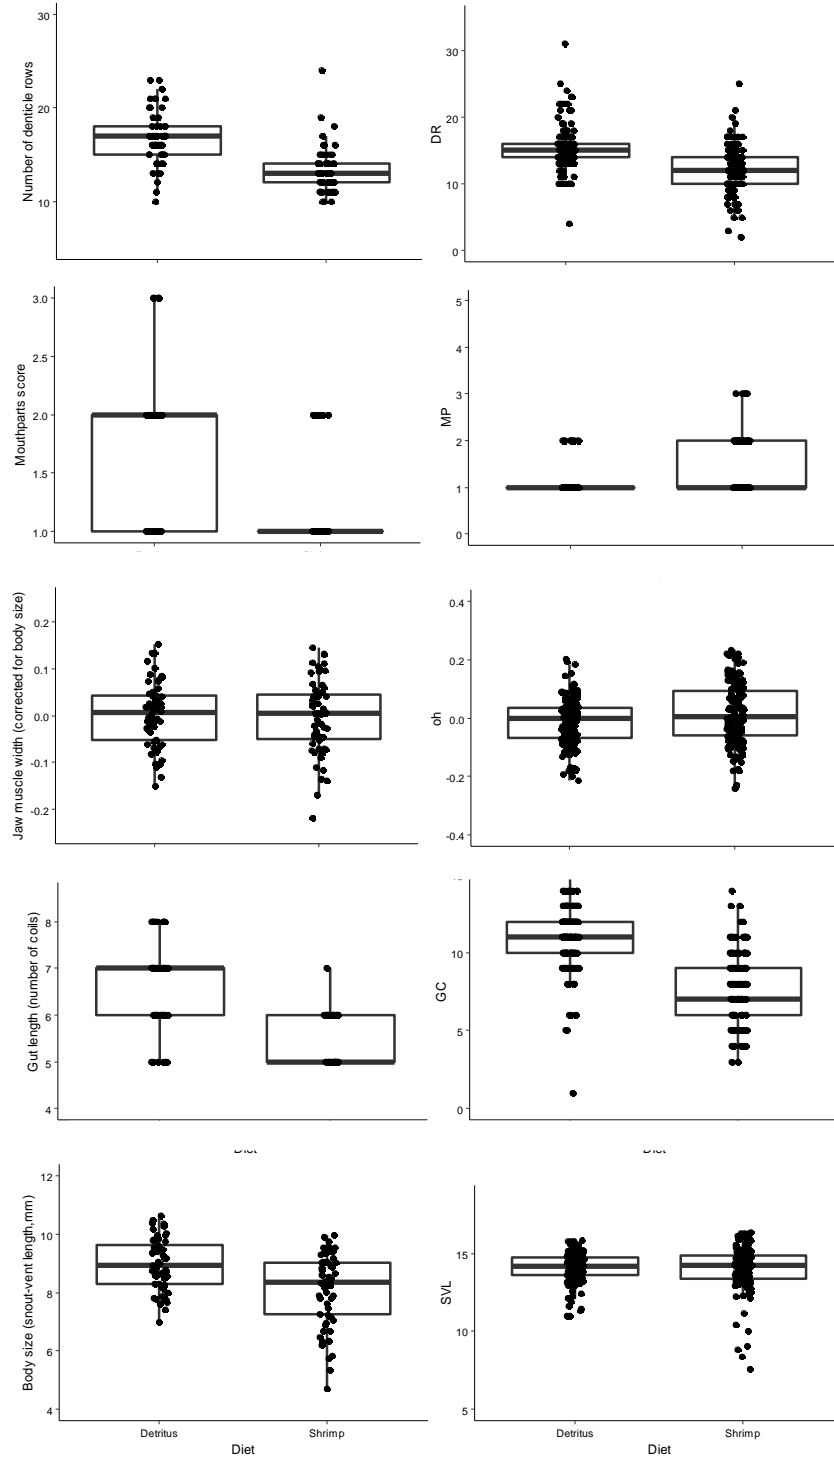

84

85 Fig. S2. Diet-induced morphological plasticity in *Sc. holbrookii* reared on detritus or shrimp (left  
 86 panels) and *Sp. multiplicata* reared on detritus or shrimp (right panels). Points: values for  
 87 individual tadpoles (for mean  $\pm$  s.e.m. plots, see Fig. 2).

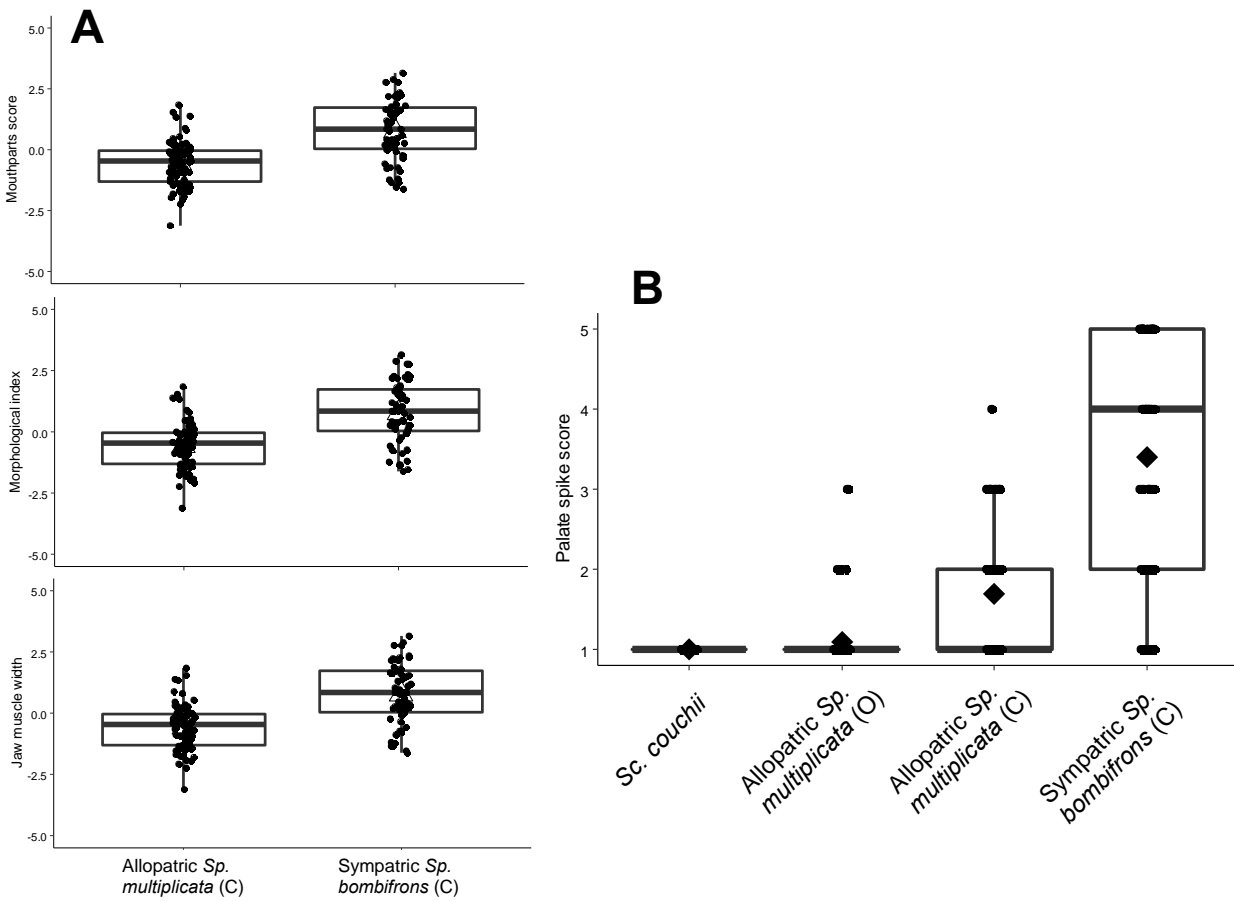

88

89

90 Fig. S3. **A**, Differences in magnitude of expression of trophic traits of carnivores in a lineage in

91 which carnivores are produced at low-intermediate frequencies as part of a polyphenism

92 (allopatric *Sp. multiplicata*) versus a lineage in which carnivores are produced at high

93 frequencies (sympatric *Sp. bombifrons*). **B**, Differences in magnitude of expression of a novel

94 palate spike in lineages/morphs that differ in likelihood of expressing carnivore features.

95 Diamonds: mean values. In all panels, points are values for individual tadpoles (for mean  $\pm$

96 s.e.m. plots, see Fig. 5).
